# Supplementary figures and images for: Programming gene expression with combinatorial promoters
Source: PubMed Central journal article supplement — Mol Syst Biol. 2007 Nov 13;3:145. doi: 10.1038/msb4100187 (PMC2132448; doi:10.1038/msb4100187), 2007-11-13

**Figure S1.**

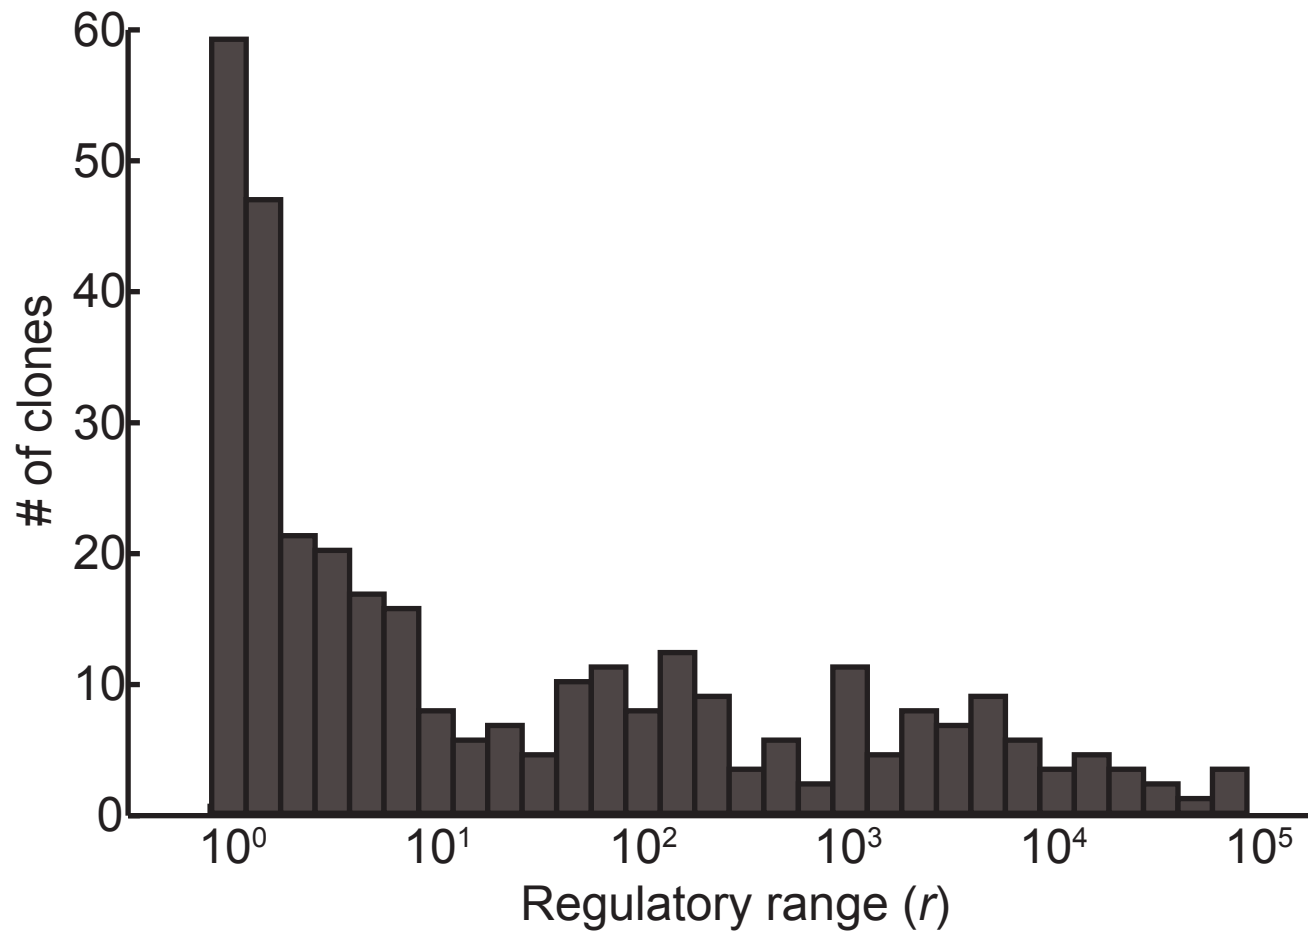

Supplement: msb4100187-s2.pdf [file msb4100187-s2.pdf]

**Figure S5.**

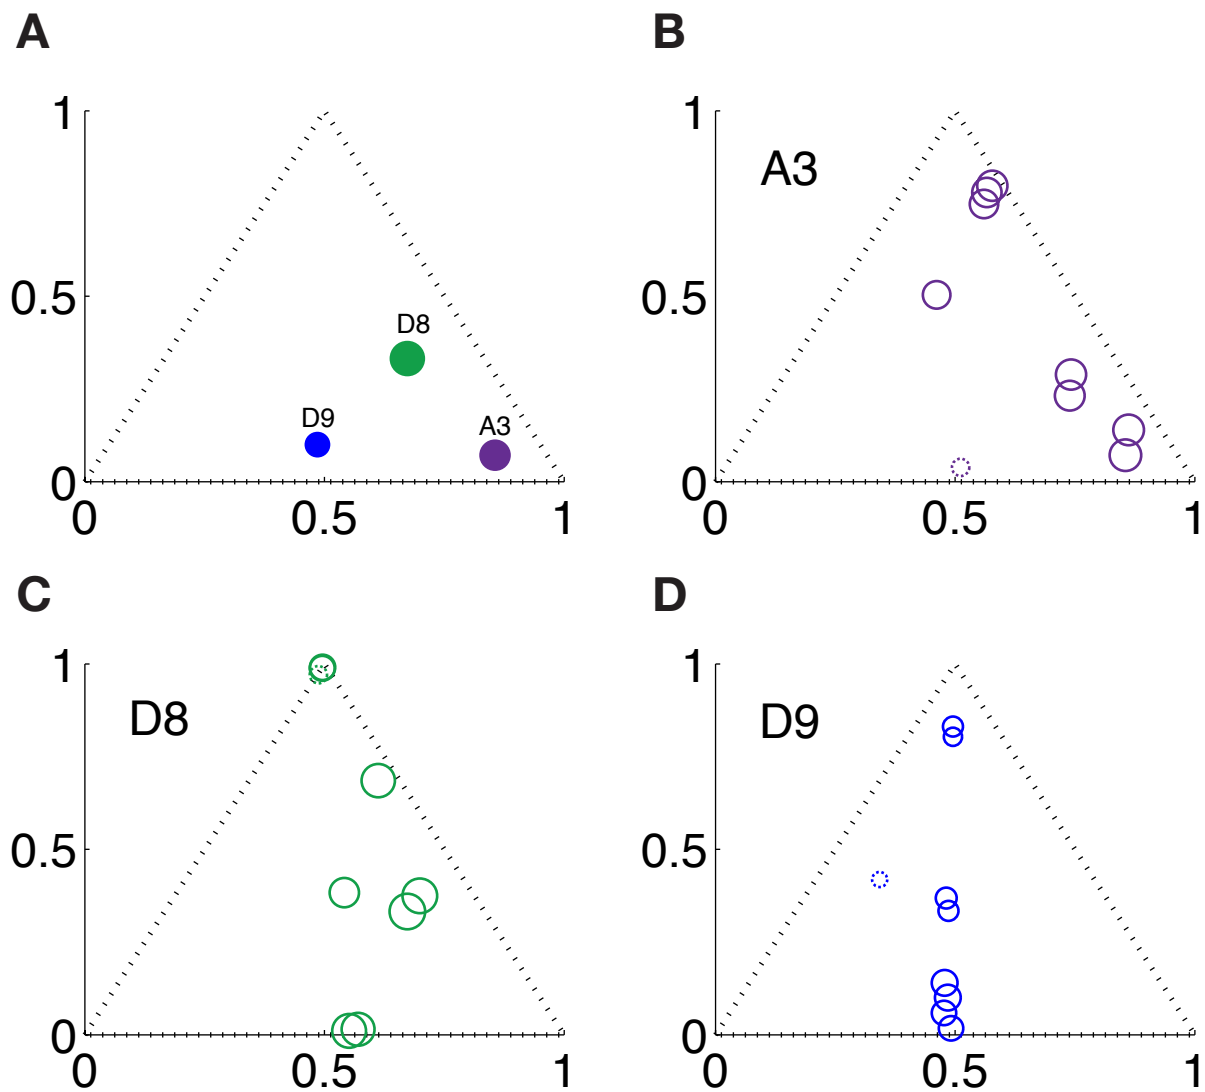

Supplement: msb4100187-s6.pdf [file msb4100187-s6.pdf]
